# Supplementary material
Source: Springer Nature journal article supplement (https://www.springermedizin.de/resource/supplementary/13024_2010_176_MOESM3_ESM.pdf/9643590)

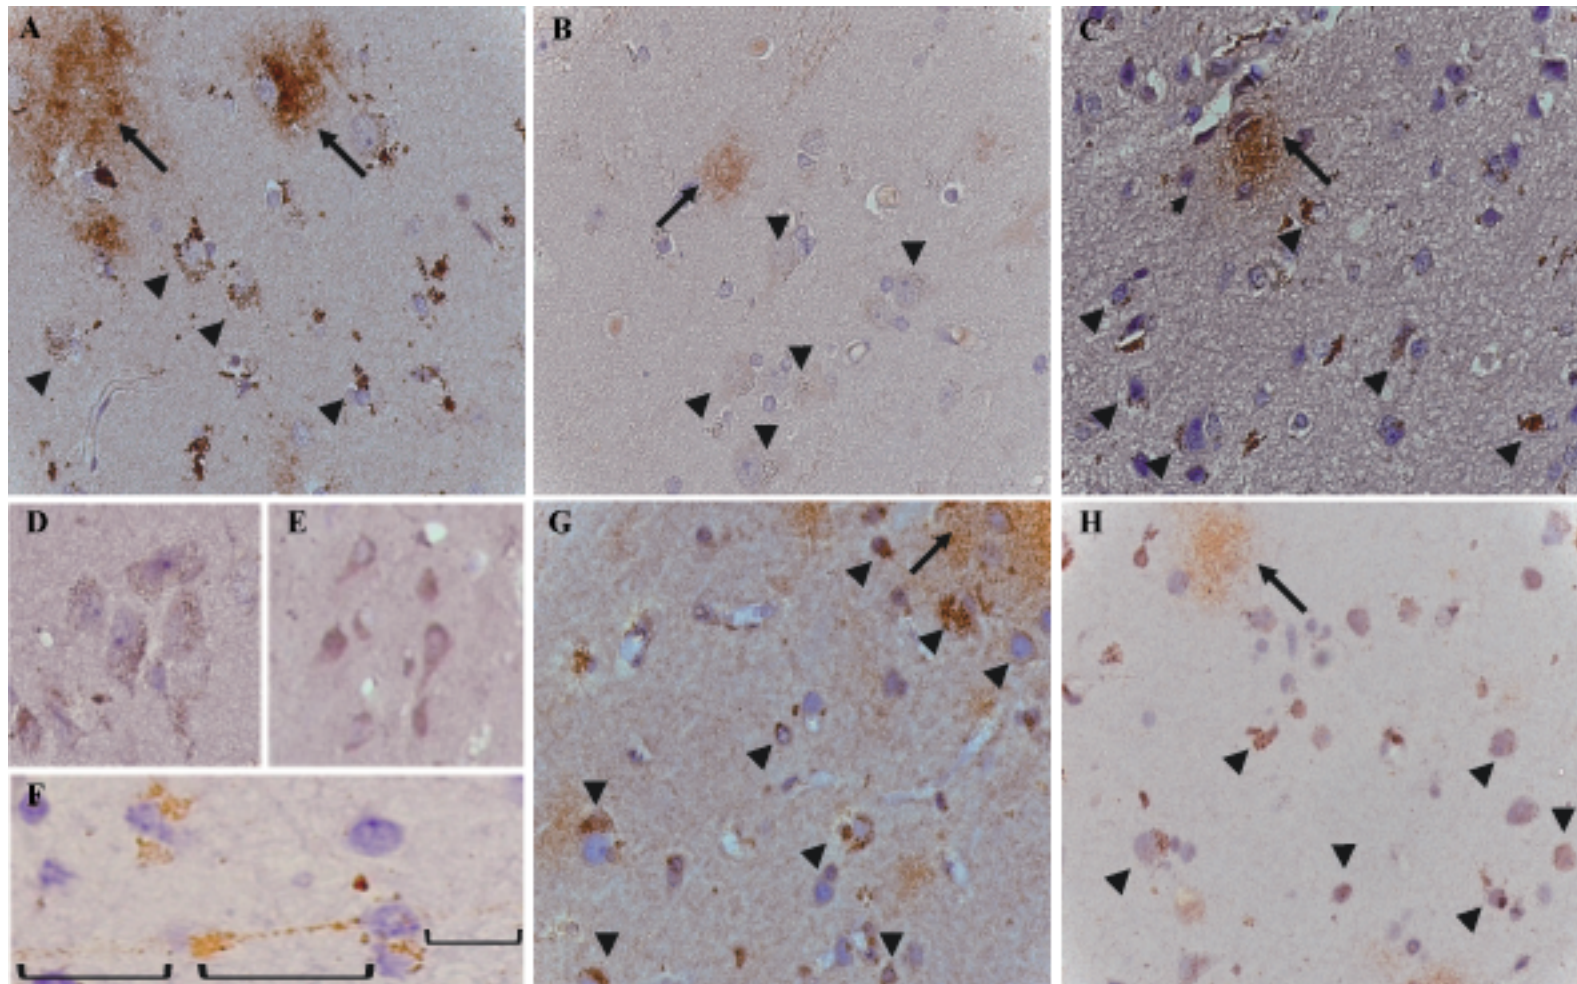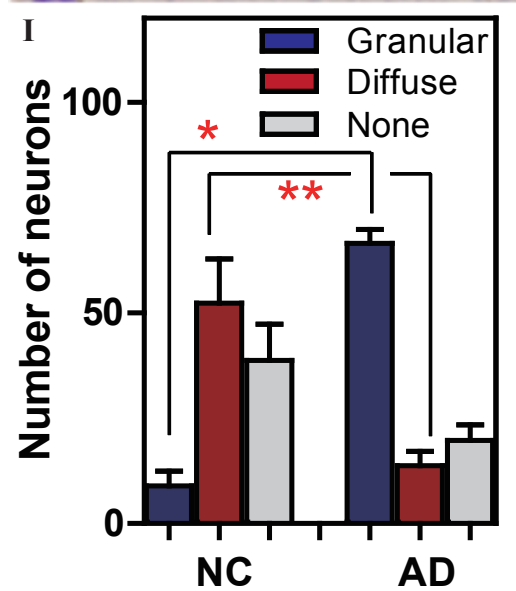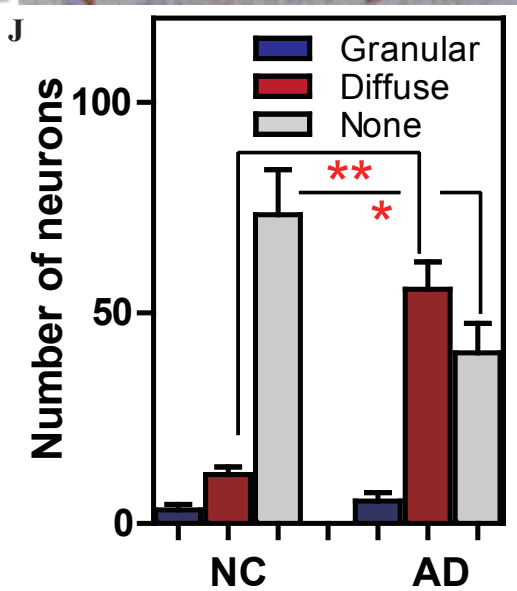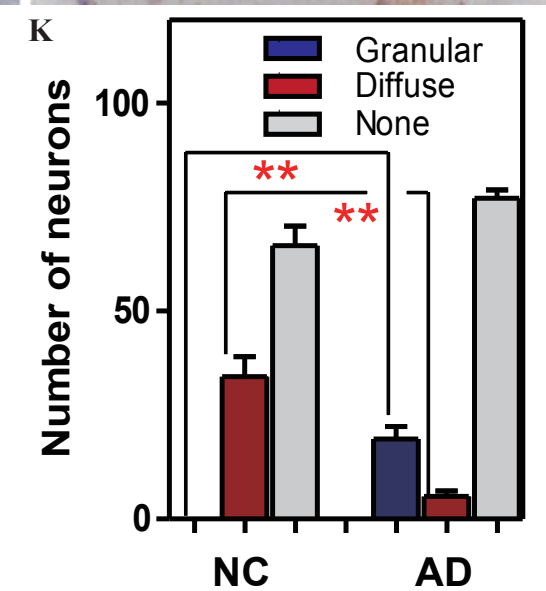

Supplement: MOESM3 [file 9643590]
